# Supplementary material for: Subcutaneous Adipose Tissue Measured by B-Mode Ultrasound to Assess and Monitor Obesity and Cardio–Metabolic Risk in Children and Adolescents
Source: MDPI journal article supplement (doi:10.3390/biology10050449), 2021-05-20
Supplement: s1 [file s1]

**Table S1.** Anthropometry, body indices and SAT in four cases excluded from descriptive statistics.

|                                | Girl   | Boy    | Girl   | Boy    |
|--------------------------------|--------|--------|--------|--------|
| age                            | 10     | 11     | 11     | 15     |
| <i>Anthropometric measures</i> |        |        |        |        |
| body height (m)                | 1.31   | 1.43   | 1.48   | 1.66   |
| body weight (kg)               | 60.69  | 65.48  | 86.83  | 126.20 |
| sitting height (m)             | 0.65   | 0.73   | 0.78   | 0.88   |
| leg length (m)                 | 0.74   | 0.81   | 0.81   | 0.99   |
| neck circumference (cm)        | 29     | 34     | 32     | 41     |
| chest circumference (cm)       | 65     | 83     | 95     | 119    |
| mid upper arm circ. (cm)       | 34     | 32     | 36     | 40     |
| waist circumference (cm)       | 91     | 96     | 96     | 123    |
| hip circumference (cm)         | 106    | 101    | 124    | 132    |
| thigh circumference (cm)       | 54     | 56     | 67     | 80     |
| calf circumference (cm)        | 36     | 36     | 50     | 48     |
| ankle circumference (cm)       | 23     | 27     | 32     | 29     |
| <i>Body indices</i>            |        |        |        |        |
| BMI (kg/m <sup>2</sup> )       | 35.64  | 31.89  | 39.43  | 45.80  |
| MI <sub>1</sub> (0.53 m/(hs))  | 38.49  | 33.18  | 40.31  | 45.79  |
| Cormic index                   | 0.50   | 0.51   | 0.53   | 0.53   |
| WHt ratio (m)                  | 0.69   | 0.57   | 0.61   | 0.73   |
| <i>SAT measures (in mm)</i>    |        |        |        |        |
| upper abdomen (UA)             | 42.49  | 35.89  | 49.86  | 51.46  |
| lower abdomen (LA)             | 46.51  | 43.81  | 61.16  | 73.34  |
| front thigh (FT)               | 32.20  | 26.56  | 42.53  | 34.25  |
| lateral thigh (LT)             | 66.48  | 52.21  | 50.25  | 55.55  |
| medial calf (MC)               | 15.40  | 19.20  | 32.44  | 24.69  |
| erector spinae (ES)            | 28.15  | 44.76  | 29.41  | 39.57  |
| distal triceps (DT)            | 25.37  | 14.05  | 12.79  | 22.22  |
| brachioradialis (BR)           | 13.10  | 10.64  | 10.89  | 14.17  |
| D <sub>I</sub>                 | 269.69 | 247.11 | 289.33 | 315.25 |
| D <sub>E</sub>                 | 262.73 | 238.91 | 280.97 | 297.56 |
| Fibres                         | 6.96   | 8.20   | 8.35   | 17.69  |
| SAT (kg)                       | 18.51  | 19.42  | 24.66  | 33.28  |
| SAT (%)                        | 30.50  | 29.66  | 28.40  | 26.37  |
| <i>Hemodynamic measures</i>    |        |        |        |        |
| SBP                            | 126    | 149    | 185    | 156    |
| DBP                            | 70     | 91     | 106    | 77     |
| HR                             | 85.7   | 84.7   | 87.7   | 84.3   |

Abbreviations: BMI: body mass index; MI: mass index; WHt: waist to height ratio; SAT: subcutaneous adipose tissue; D<sub>I</sub>: sum SAT including fibres; D<sub>E</sub>: sum SAT excluding fibres, SAT in kg and in %, SBP: systolic blood pressure, DBP: diastolic blood pressure, HR: heart rate.

**Figure S1.** SAT thicknesses (mm) at the eight standardized sites in female (A) and male (B) children and adolescents.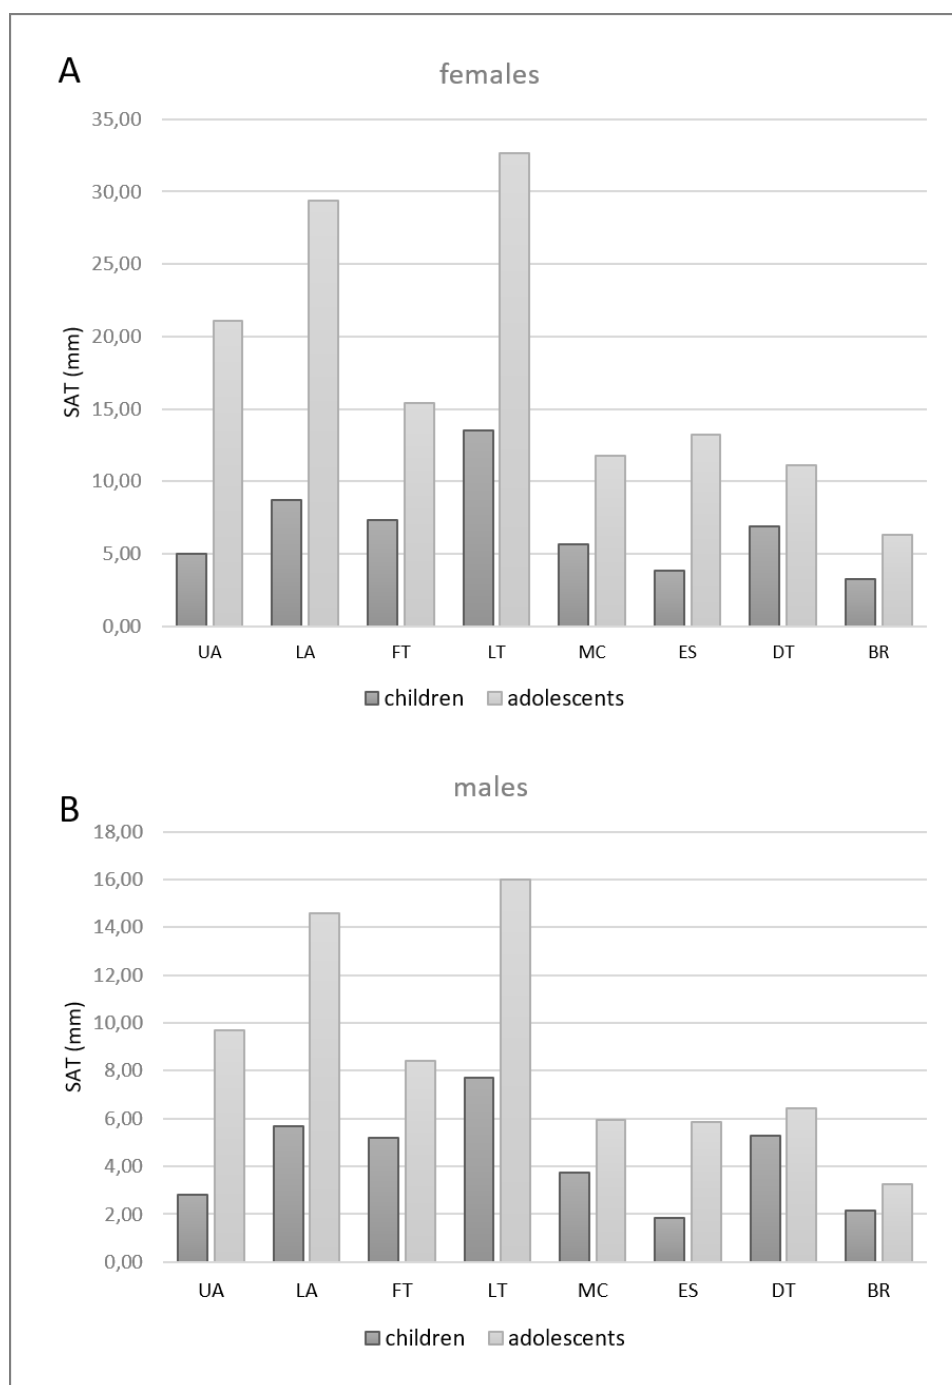

Abbreviations: UA: upper abdomen, LA: lower abdomen, FT: frontal thigh, LT: lateral thigh, MC: medial calf, ES: erector spinae, DT: distal triceps, BR: brachioradialis.

**Table S2.** Correlation of subcutaneous adipose tissue (SAT) and anthropometric measures at eight sites in children (7–10 years) and adolescents (13–17 years).

| Children       | Neck   | Chest  | MUA    | Waist  | Hip    | Thigh  | Calf   | Ankle  | BMI    |
|----------------|--------|--------|--------|--------|--------|--------|--------|--------|--------|
| UA             | .345** | .473** | .539** | .595** | .531** | .648** | .481** | .192   | .687** |
| LA             | .385** | .544** | .608** | .659** | .643** | .702** | .565** | .270*  | .757** |
| FT             | .271*  | .286*  | .477** | .426** | .443** | .620** | .379** | .112   | .502** |
| LT             | .243*  | .322** | .562** | .441** | .465** | .694** | .473** | .187   | .539** |
| MC             | .235*  | .308** | .478** | .465** | .497** | .662** | .488** | .154   | .505** |
| ES             | .340** | .411** | .535** | .518** | .487** | .618** | .387** | .291*  | .539** |
| DT             | .230   | .383** | .534** | .457** | .443** | .688** | .482** | .183   | .491** |
| BR             | .286*  | .352** | .554** | .454** | .478** | .660** | .469** | .118   | .651** |
| D <sub>I</sub> | .336** | .449** | .611** | .579** | .572** | .747** | .533** | .225   | .670** |
| D <sub>E</sub> | .337** | .448** | .611** | .580** | .580** | .743** | .521** | .217   | .666** |
| Fibres         | .169   | .254*  | .332** | .300** | .192   | .470** | .459** | .230   | .417** |
| SAT (kg)       | .465** | .583** | .637** | .658** | .680** | .815** | .651** | .373** | .745** |
| SAT (%)        | 0.222  | .279*  | .543** | .371** | .426** | .671** | .445** | 0.151  | .461** |
| BMI            | .499** | .613** | .498** | .711** | .696** | .680** | .673** | .333** | 1      |
| Adolescents    | Neck   | Chest  | MUA    | Waist  | Hip    | Thigh  | Calf   | Ankle  | BMI    |
| UA             | .440** | .869** | .782** | .851** | .819** | .782** | .718** | .596** | .859** |
| LA             | .494** | .881** | .791** | .887** | .856** | .809** | .741** | .616** | .863** |
| FT             | .389** | .796** | .731** | .739** | .867** | .833** | .794** | .696** | .860** |
| LT             | .326** | .728** | .680** | .706** | .796** | .690** | .609** | .528** | .765** |
| MC             | .335** | .764** | .722** | .702** | .834** | .772** | .791** | .698** | .831** |
| ES             | .316** | .795** | .694** | .737** | .817** | .714** | .634** | .566** | .864** |
| DT             | .373** | .780** | .756** | .726** | .827** | .762** | .710** | .640** | .800** |
| BR             | .300** | .762** | .745** | .729** | .759** | .707** | .684** | .568** | .788** |
| D <sub>I</sub> | .429** | .884** | .808** | .852** | .896** | .828** | .763** | .652** | .906** |
| D <sub>E</sub> | .420** | .881** | .803** | .847** | .895** | .825** | .762** | .650** | .905** |
| Fibres         | .422** | .507** | .518** | .565** | .453** | .481** | .403** | .379** | .486** |
| SAT (kg)       | .486** | .905** | .826** | .874** | .922** | .872** | .825** | .726** | .938** |
| SAT (%)        | .308** | .788** | .717** | .730** | .841** | .714** | .674** | .539** | .779** |
| BMI            | .494** | .886** | .814** | .840** | .906** | .882** | .820** | .746** | 1      |

Abbreviations: MUA: mid upper arm circumference, UA: upper abdomen, LA: lower abdomen, FT: frontal thigh, LT: lateral thigh, MC: medial calf, ES: erector spinae, DT: distal triceps, BR: brachioradialis; D<sub>I</sub>: sum SAT including fibres; D<sub>E</sub>: sum SAT excluding fibres, SAT (subcutaneous adipose tissue) in kg and in %; BMI: body mass index. \*,\*\* correlation is significant at  $p < .05/p < .01$ , respectively.

**Table S3.** Correlation between SAT at the eight standardized sites and hemodynamic parameters.

| <b>Children</b>     | <b>SBP</b> | <b>DBP</b> | <b>HR</b> |
|---------------------|------------|------------|-----------|
| upper abdomen (UA)  | .548**     | .405**     | -.014     |
| lower abdomen (LA)  | .590**     | .423**     | -.029     |
| front thigh (FT)    | .554**     | .404**     | .002      |
| lateral thigh (LT)  | .459**     | .338**     | -.017     |
| medial calf (MC)    | .576**     | .432**     | .005      |
| erector spinae (ES) | .528**     | .410**     | -.021     |
| distal triceps (DT) | .356**     | .200       | .039      |
| upper abdomen (UA)  | .519**     | .380**     | -.027     |
| Di                  | .550**     | .402**     | -.013     |
| DE                  | .548**     | .400**     | -.009     |
| Fibres              | .380**     | .298**     | -.129     |
| SAT (kg)            | .620**     | .472**     | -.021     |
| SAT (%)             | .425**     | .302*      | .033      |
| <b>adolescents</b>  | <b>SBP</b> | <b>DBP</b> | <b>HR</b> |
| upper abdomen (UA)  | .537**     | .258*      | -.005     |
| lower abdomen (LA)  | .547**     | .260*      | .037      |
| front thigh (FT)    | .408**     | .252*      | .054      |
| lateral thigh (LT)  | .433**     | .222*      | -.001     |
| medial calf (MC)    | .404**     | .183       | .091      |
| erector spinae (ES) | .514**     | .226*      | .117      |
| distal triceps (DT) | .490**     | .225*      | .042      |
| upper abdomen (UA)  | .506**     | .254*      | .047      |
| Di                  | .534**     | .262*      | .040      |
| DE                  | .525**     | .252*      | .042      |
| Fibres              | .528**     | .371**     | -.020     |
| SAT (kg)            | .555**     | .264*      | .049      |
| SAT (%)             | .436**     | .205       | .064      |

Abbreviations: SBP: systolic blood pressure (mmHg), DBP: diastolic blood pressure (mmHg), HR: heart rate, SAT: subcutaneous adipose tissue (mm); Di: sum SAT including fibres DE: sum SAT excluding fibres, SAT in kg and in %. Note: \*, \*\* flag significant correlations ( $p < .05$ ,  $< .01$ , respectively).

**Table S4.** Descriptive statistics and correlation between SAT measures based on 8-site, 5-site and 4-site measurements in the total cohort (n= 162).

|                        | mean                      | SD                        | min.              | max.             |                 |
|------------------------|---------------------------|---------------------------|-------------------|------------------|-----------------|
| D <sub>I</sub> 8-sites | 95.19                     | 71.04                     | 14.98             | 315.25           |                 |
| D <sub>E</sub> 8-sites | 89.49                     | 69.29                     | 11.09             | 303.11           |                 |
| Fibres 8-sites         | 5.70                      | 2.64                      | 2.21              | 17.69            |                 |
| SAT (kg) 8-sites       | 8.73                      | 6.72                      | 1.84              | 35.24            |                 |
| SAT (%) 8-sites        | 16.97                     | 6.41                      | 4.76              | 31.83            |                 |
|                        |                           |                           |                   |                  |                 |
| D <sub>I</sub> 5-sites | 72.80                     | 55.88                     | 11.73             | 247.26           |                 |
| D <sub>E</sub> 5-sites | 68.45                     | 54.64                     | 8.11              | 238.87           |                 |
| Fibres 5-sites         | 4.35                      | 2.00                      | 1.58              | 15.20            |                 |
| SAT (kg) 5-sites       | 8.04                      | 6.18                      | 1.67              | 31.19            |                 |
| SAT (%) 5-sites        | 15.73                     | 6.12                      | 4.93              | 30.28            |                 |
|                        |                           |                           |                   |                  |                 |
| D <sub>I</sub> 4-sites | 65.23                     | 51.81                     | 9.25              | 226.72           |                 |
| D <sub>E</sub> 4-sites | 61.20                     | 50.46                     | 7.02              | 218.53           |                 |
| Fibres 4-sites         | 4.03                      | 2.11                      | 1.37              | 15.19            |                 |
| SAT (kg) 4-sites       | 8.15                      | 6.44                      | 1.66              | 31.25            |                 |
| SAT (%) 4-sites        | 15.69                     | 6.30                      | 4.67              | 31.09            |                 |
|                        | D <sub>I</sub><br>8-sites | D <sub>E</sub><br>8-sites | Fibres<br>8-sites | SAT (kg) 8-sites | SAT (%) 8-sites |
| D <sub>I</sub> 5-sites | .998**                    | .997**                    | .668**            | .978**           | .939**          |
| D <sub>E</sub> 5-sites | .997**                    | .998**                    | .648**            | .977**           | .938**          |
| Fibres 5-sites         | .633**                    | .614**                    | .964**            | .654**           | .588**          |
| SAT (kg) 5-sites       | .983**                    | .982**                    | .689**            | .995**           | .895**          |
| SAT (%) 5-sites        | .944**                    | .944**                    | .633**            | .894**           | .987**          |
|                        |                           |                           |                   |                  |                 |
| D <sub>I</sub> 4-sites | .996**                    | .995**                    | .685**            | .976**           | .932**          |
| D <sub>E</sub> 4-sites | .996**                    | .996**                    | .663**            | .974**           | .933**          |
| Fibres 4-sites         | .632**                    | .611**                    | .958**            | .666**           | .570**          |
| SAT (kg) 4-sites       | .979**                    | .977**                    | .716**            | .993**           | .885**          |
| SAT (%) 4-sites        | .945**                    | .944**                    | .638**            | .892**           | .981**          |

Abbreviations: SAT: subcutaneous adipose tissue; D<sub>I</sub>: sum SAT including fibres; D<sub>E</sub>: sum SAT excluding fibres, SAT in kg and in %. Note: \*, \*\* flag significant correlations ( $p < .05$ ,  $< .01$ , respectively).
